# Supplementary material for: Increased disparity in routine infant vaccination during COVID-19
Source: bioRxiv or medRxiv preprint supplement (doi:10.1101/2022.06.30.22277115), 2022-07-02
Supplement: Supplementary file [file media-1.pdf]

**Supplementary tables**

Table S1 **Recommended infant vaccination schedule in Manitoba**

| <b>2 months</b> | <b>4 months</b> | <b>6 months</b>        | <b>12 months</b> | <b>18 months</b> |
|-----------------|-----------------|------------------------|------------------|------------------|
| DTaP            | DTaP            | DTaP                   | MMR              | DTaP             |
| Polio           | Polio           | HiB                    | Varicella        | Polio            |
| HiB             | HiB             | Rotavirus <sup>1</sup> | PCV              | Hib              |
| PCV             | PCV             |                        | MenC-C           |                  |
| Rotavirus       | Rotavirus       |                        |                  |                  |

DTaP = Diphtheria, tetanus, and acellular pertussis vaccine

HiB = Haemophilus influenzae type b vaccine

MenC-C = Meningococcal conjugate serogroup C vaccine

MMR = Measles, mumps, and rubella vaccine

PCV = 13-valent pneumococcal conjugate vaccine

Note that some of these are administered in combination as one product, e.g., MMR and varicella.

<sup>1</sup>Only for kids born March 2018 and later. This vaccine is excluded from the analysis, because the 6-month dose was introduced shortly before the start of the pandemic.

Table S2 **Changes in vaccine uptake (%) of routine childhood vaccines during the pandemic (data ending November 30, 2021).**

| <b>Polio</b>                           | <b>Dose 2 uptake at 12 months<sup>a</sup></b> |                 |                        |                    |
|----------------------------------------|-----------------------------------------------|-----------------|------------------------|--------------------|
|                                        | <b>Pre-pandemic</b>                           | <b>Pandemic</b> | <b>Relative change</b> | <b>Fold change</b> |
| Overall                                | 88                                            | 83              | -6%                    |                    |
| Gender                                 |                                               |                 |                        |                    |
| Male                                   | 88                                            | 82              | -7%                    | ref.               |
| Female                                 | 88                                            | 83              | -6%                    | 0.8                |
| Income quintile                        |                                               |                 |                        |                    |
| Q1 (lowest)                            | 85                                            | 77              | -9%                    | 2.9                |
| Q2                                     | 89                                            | 83              | -7%                    | 2.2                |
| Q3                                     | 90                                            | 85              | -5%                    | 1.5                |
| Q4                                     | 88                                            | 83              | -6%                    | 1.7                |
| Q5 (highest)                           | 91                                            | 88              | -3%                    | ref.               |
| Unknown                                | 89                                            | 86              | -3%                    | 1.0                |
| Residence                              |                                               |                 |                        |                    |
| Rural                                  | 81                                            | 71              | -12%                   | 6.0                |
| Urban                                  | 94                                            | 92              | -2%                    | ref.               |
| Unknown                                | 88                                            | 100             | 14%                    | -7.0               |
| Winnipeg region of residence           |                                               |                 |                        |                    |
| Northern suburbs                       | 95                                            | 92              | -3%                    | 2.1                |
| Inner city                             | 91                                            | 88              | -3%                    | 2.3                |
| Southern suburbs                       | 95                                            | 94              | -1%                    | ref.               |
| Regional health authority of residence |                                               |                 |                        |                    |
| Winnipeg                               | 94                                            | 92              | -2%                    | ref.               |
| Interlake-Eastern                      | 86                                            | 76              | -13%                   | 6.1                |
| Northern                               | 84                                            | 72              | -15%                   | 7.2                |
| Southern                               | 73                                            | 65              | -12%                   | 5.9                |
| Prairie Mountain                       | 89                                            | 85              | -5%                    | 2.3                |
| Public Trustee / In CFS care           | 88                                            | 100             | 14%                    | -6.8               |
|                                        | <b>Dose 3 uptake at 18 months<sup>b</sup></b> |                 |                        |                    |
| <b>PCV</b>                             | <b>Pre-pandemic</b>                           | <b>Pandemic</b> | <b>Relative change</b> | <b>Fold change</b> |
| Overall                                | 78                                            | 72              | -8%                    |                    |
| Gender                                 |                                               |                 |                        |                    |
| Male                                   | 79                                            | 72              | -8%                    | ref.               |

|                                               |    |    |      |      |
|-----------------------------------------------|----|----|------|------|
| Female                                        | 78 | 73 | -7%  | 0.9  |
| <b>Income quintile</b>                        |    |    |      |      |
| Q1 (lowest)                                   | 71 | 64 | -11% | 2.9  |
| Q2                                            | 80 | 72 | -10% | 2.7  |
| Q3                                            | 81 | 76 | -7%  | 1.8  |
| Q4                                            | 80 | 74 | -7%  | 1.9  |
| Q5 (highest)                                  | 84 | 80 | -4%  | ref. |
| Unknown                                       | 81 | 78 | -3%  | 0.7  |
| <b>Residence</b>                              |    |    |      |      |
| Rural                                         | 70 | 63 | -10% | 1.7  |
| Urban                                         | 85 | 80 | -6%  | ref. |
| Unknown                                       | 78 | 55 | -29% | 4.9  |
| <b>Winnipeg region of residence</b>           |    |    |      |      |
| Northern suburbs                              | 86 | 81 | -5%  | 0.9  |
| Inner city                                    | 79 | 73 | -8%  | 1.4  |
| Southern suburbs                              | 87 | 82 | -6%  | ref. |
| <b>Regional health authority of residence</b> |    |    |      |      |
| Winnipeg                                      | 85 | 80 | -6%  | ref. |
| Interlake-Eastern                             | 76 | 68 | -10% | 1.7  |
| Northern                                      | 70 | 61 | -13% | 2.2  |
| Southern                                      | 64 | 58 | -9%  | 1.6  |
| Prairie Mountain                              | 80 | 73 | -9%  | 1.5  |
| Public Trustee / In CFS care                  | 78 | 55 | -29% | 5.1  |

**Dose 1 uptake at 24 months<sup>c</sup>**

| <b>MenC-C</b>          | <b>Pre-pandemic Pandemic Relative change Fold change</b> |    |      |      |
|------------------------|----------------------------------------------------------|----|------|------|
|                        |                                                          |    |      |      |
| Overall                | 86                                                       | 80 | -7%  |      |
| <b>Gender</b>          |                                                          |    |      |      |
| Male                   | 86                                                       | 80 | -7%  | ref. |
| Female                 | 86                                                       | 80 | -7%  | 1.1  |
| <b>Income quintile</b> |                                                          |    |      |      |
| Q1 (lowest)            | 83                                                       | 73 | -11% | 4.8  |
| Q2                     | 88                                                       | 79 | -9%  | 4.0  |
| Q3                     | 87                                                       | 84 | -3%  | 1.2  |
| Q4                     | 87                                                       | 81 | -7%  | 2.8  |
| Q5 (highest)           | 89                                                       | 87 | -2%  | ref. |
| Unknown                | 87                                                       | 86 | -1%  | 0.6  |
| <b>Residence</b>       |                                                          |    |      |      |

|                                        |    |    |      |      |
|----------------------------------------|----|----|------|------|
| Rural                                  | 80 | 70 | -12% | 4.1  |
| Urban                                  | 92 | 89 | -3%  | ref. |
| Unknown                                | 77 | 53 | -31% | 10.9 |
| Winnipeg region of residence           |    |    |      |      |
| Northern suburbs                       | 93 | 90 | -3%  | 2.0  |
| Inner city                             | 87 | 83 | -5%  | 3.6  |
| Southern suburbs                       | 93 | 92 | -1%  | ref. |
| Regional health authority of residence |    |    |      |      |
| Winnipeg                               | 92 | 89 | -3%  | ref. |
| Interlake-Eastern                      | 83 | 78 | -6%  | 2.2  |
| Northern                               | 85 | 71 | -16% | 6.3  |
| Southern                               | 72 | 63 | -12% | 4.6  |
| Prairie Mountain                       | 87 | 79 | -10% | 3.7  |
| Public Trustee / In CFS care           | 77 | 53 | -31% | 12.0 |

#### Dose 1 uptake at 24 months<sup>c</sup>

| Varicella                              | Dose 1 uptake at 24 months <sup>c</sup> |          |                 |             |
|----------------------------------------|-----------------------------------------|----------|-----------------|-------------|
|                                        | Pre-pandemic                            | Pandemic | Relative change | Fold change |
| Overall                                | 86                                      | 80       | -7%             |             |
| Gender                                 |                                         |          |                 |             |
| Male                                   | 85                                      | 80       | -6%             | ref.        |
| Female                                 | 86                                      | 80       | -7%             | 1.1         |
| Income quintile                        |                                         |          |                 |             |
| Q1 (lowest)                            | 82                                      | 73       | -11%            | 5.1         |
| Q2                                     | 87                                      | 79       | -9%             | 4.2         |
| Q3                                     | 86                                      | 84       | -3%             | 1.2         |
| Q4                                     | 86                                      | 80       | -6%             | 2.8         |
| Q5 (highest)                           | 88                                      | 86       | -2%             | ref.        |
| Unknown                                | 85                                      | 85       | 0%              | -0.1        |
| Residence                              |                                         |          |                 |             |
| Rural                                  | 79                                      | 70       | -11%            | 4.1         |
| Urban                                  | 91                                      | 88       | -3%             | ref.        |
| Unknown                                | 81                                      | 53       | -34%            | 12.0        |
| Winnipeg region of residence           |                                         |          |                 |             |
| Northern suburbs                       | 92                                      | 89       | -3%             | 3.0         |
| Inner city                             | 87                                      | 82       | -6%             | 5.5         |
| Southern suburbs                       | 92                                      | 91       | -1%             | ref.        |
| Regional health authority of residence |                                         |          |                 |             |
| Winnipeg                               | 91                                      | 89       | -3%             | ref.        |

|                              |    |    |      |      |
|------------------------------|----|----|------|------|
| Interlake-Eastern            | 83 | 77 | -7%  | 2.6  |
| Northern                     | 85 | 71 | -16% | 6.3  |
| Southern                     | 71 | 63 | -11% | 4.4  |
| Prairie Mountain             | 88 | 80 | -9%  | 3.4  |
| Public Trustee / In CFS care | 81 | 53 | -34% | 13.1 |

#### Dose 3 uptake at 24 months<sup>d</sup>

| Polio                                  | Dose 3 uptake at 24 months <sup>d</sup> |          |                 |             |
|----------------------------------------|-----------------------------------------|----------|-----------------|-------------|
|                                        | Pre-pandemic                            | Pandemic | Relative change | Fold change |
| Overall                                | 87                                      | 84       | -3%             |             |
| Gender                                 |                                         |          |                 |             |
| Male                                   | 87                                      | 84       | -3%             | ref.        |
| Female                                 | 87                                      | 84       | -4%             | 1.2         |
| Income quintile                        |                                         |          |                 |             |
| Q1 (lowest)                            | 83                                      | 78       | -6%             | 6.7         |
| Q2                                     | 88                                      | 85       | -4%             | 4.6         |
| Q3                                     | 88                                      | 87       | -2%             | 1.9         |
| Q4                                     | 87                                      | 85       | -2%             | 2.2         |
| Q5 (highest)                           | 90                                      | 89       | -1%             | ref.        |
| Unknown                                | 89                                      | 88       | -1%             | 1.2         |
| Residence                              |                                         |          |                 |             |
| Rural                                  | 80                                      | 76       | -5%             | 3.4         |
| Urban                                  | 93                                      | 91       | -2%             | ref.        |
| Unknown                                | 84                                      | 85       | 1%              | -0.6        |
| Winnipeg region of residence           |                                         |          |                 |             |
| Northern suburbs                       | 94                                      | 92       | -2%             | 1.7         |
| Inner city                             | 90                                      | 86       | -4%             | 4.1         |
| Southern suburbs                       | 94                                      | 93       | -1%             | ref.        |
| Regional health authority of residence |                                         |          |                 |             |
| Winnipeg                               | 93                                      | 92       | -2%             | ref.        |
| Interlake-Eastern                      | 85                                      | 82       | -3%             | 1.9         |
| Northern                               | 83                                      | 75       | -10%            | 5.5         |
| Southern                               | 73                                      | 70       | -5%             | 3.0         |
| Prairie Mountain                       | 88                                      | 86       | -2%             | 1.0         |
| Public Trustee / In CFS care           | 84                                      | 85       | 1%              | -0.5        |

#### Dose 4 uptake at 24 months<sup>d</sup>

| HiB     | Dose 4 uptake at 24 months <sup>d</sup> |          |                 |             |
|---------|-----------------------------------------|----------|-----------------|-------------|
|         | Pre-pandemic                            | Pandemic | Relative change | Fold change |
| Overall | 71                                      | 63       | -10%            |             |
| Gender  |                                         |          |                 |             |

|                                        |    |    |      |      |
|----------------------------------------|----|----|------|------|
| Male                                   | 70 | 63 | -10% | ref. |
| Female                                 | 71 | 63 | -10% | 1.1  |
| Income quintile                        |    |    |      |      |
| Q1 (lowest)                            | 60 | 49 | -18% | 3.9  |
| Q2                                     | 71 | 60 | -14% | 3.1  |
| Q3                                     | 75 | 70 | -6%  | 1.3  |
| Q4                                     | 75 | 69 | -8%  | 1.7  |
| Q5 (highest)                           | 78 | 75 | -5%  | ref. |
| Unknown                                | 70 | 71 | 2%   | -0.4 |
| Residence                              |    |    |      |      |
| Rural                                  | 61 | 52 | -15% | 2.2  |
| Urban                                  | 78 | 73 | -7%  | ref. |
| Unknown                                | 55 | 42 | -23% | 3.4  |
| Winnipeg region of residence           |    |    |      |      |
| Northern suburbs                       | 81 | 75 | -7%  | 1.5  |
| Inner city                             | 69 | 60 | -13% | 2.9  |
| Southern suburbs                       | 81 | 77 | -5%  | ref. |
| Regional health authority of residence |    |    |      |      |
| Winnipeg                               | 78 | 73 | -7%  | ref. |
| Interlake-Eastern                      | 68 | 60 | -12% | 1.7  |
| Northern                               | 51 | 38 | -25% | 3.7  |
| Southern                               | 59 | 50 | -16% | 2.4  |
| Prairie Mountain                       | 74 | 67 | -9%  | 1.4  |
| Public Trustee / In CFS care           | 55 | 42 | -23% | 3.4  |

PCV = 13-valent pneumococcal conjugate vaccine

MenC-C = Meningococcal conjugate serogroup C vaccine

HiB = Haemophilus influenzae type b vaccine

<sup>a</sup> Recommended age is 4 months; Pre-pandemic cohort, born January 1, 2017 - March 15, 2019; Pandemic cohort, born November 15, 2019 and later

<sup>b</sup> Recommended age is 12 months; Pre-pandemic cohort, born January 1, 2017 - September 15, 2018; Pandemic cohort, born March 15, 2019 and later

<sup>c</sup> Recommended age is 12 months; Pre-pandemic cohort, born January 1, 2017 - March 15, 2018; Pandemic cohort, born March 15, 2019 and later

<sup>d</sup> Recommended age is 18 months; Pre-pandemic cohort, born January 1, 2017 - March 15, 2018; Pandemic cohort, born September 15, 2018 and later

Table S3 **Vaccine uptake (%) of routine childhood vaccines during the pandemic (data ending November 30, 2021).**

| <b>Polio</b>                           | <b>Dose 2 uptake at 12 months<sup>a</sup></b> |
|----------------------------------------|-----------------------------------------------|
|                                        | <b>Intermediate</b>                           |
| Overall                                | 87                                            |
| Gender                                 |                                               |
| Male                                   | 86                                            |
| Female                                 | 87                                            |
| Income quintile                        |                                               |
| Q1 (lowest)                            | 82                                            |
| Q2                                     | 87                                            |
| Q3                                     | 89                                            |
| Q4                                     | 85                                            |
| Q5 (highest)                           | 92                                            |
| Unknown                                | 90                                            |
| Residence                              |                                               |
| Rural                                  | 79                                            |
| Urban                                  | 93                                            |
| Unknown                                | 76                                            |
| Winnipeg region of residence           |                                               |
| Northern suburbs                       | 93                                            |
| Inner city                             | 88                                            |
| Southern suburbs                       | 94                                            |
| Regional health authority of residence |                                               |
| Winnipeg                               | 93                                            |
| Interlake-Eastern                      | 84                                            |
| Northern                               | 83                                            |
| Southern                               | 72                                            |
| Prairie Mountain                       | 88                                            |
| Public Trustee / In CFS care           | 76                                            |
| <b>DTaP</b>                            | <b>Dose 3 uptake at 12 months<sup>b</sup></b> |
|                                        | <b>Intermediate</b>                           |
| Overall                                | 77                                            |
| Gender                                 |                                               |
| Male                                   | 77                                            |

|                                        |    |
|----------------------------------------|----|
| Female                                 | 78 |
| Income quintile                        |    |
| Q1 (lowest)                            | 67 |
| Q2                                     | 77 |
| Q3                                     | 81 |
| Q4                                     | 79 |
| Q5 (highest)                           | 86 |
| Unknown                                | 85 |
| Residence                              |    |
| Rural                                  | 69 |
| Urban                                  | 84 |
| Unknown                                | 58 |
| Winnipeg region of residence           |    |
| Northern suburbs                       | 86 |
| Inner city                             | 78 |
| Southern suburbs                       | 87 |
| Regional health authority of residence |    |
| Winnipeg                               | 85 |
| Interlake-Eastern                      | 75 |
| Northern                               | 62 |
| Southern                               | 66 |
| Prairie Mountain                       | 78 |
| Public Trustee / In CFS care           | 58 |

**Dose 1 uptake at 18 months<sup>c</sup>**

| MMR             | Intermediate |
|-----------------|--------------|
|                 | Overall      |
| Gender          |              |
| Male            | 81           |
| Female          | 81           |
| Income quintile |              |
| Q1 (lowest)     | 73           |
| Q2              | 82           |
| Q3              | 84           |
| Q4              | 84           |
| Q5 (highest)    | 86           |
| Unknown         | 81           |
| Residence       |              |

|                                               |                     |
|-----------------------------------------------|---------------------|
| Rural                                         | 73                  |
| Urban                                         | 88                  |
| Unknown                                       | 82                  |
| Winnipeg region of residence                  |                     |
| Northern suburbs                              | 90                  |
| Inner city                                    | 80                  |
| Southern suburbs                              | 89                  |
| Regional health authority of residence        |                     |
| Winnipeg                                      | 88                  |
| Interlake-Eastern                             | 80                  |
| Northern                                      | 71                  |
| Southern                                      | 66                  |
| Prairie Mountain                              | 84                  |
| Public Trustee / In CFS care                  | 82                  |
| <b>Dose 3 uptake at 18 months<sup>c</sup></b> |                     |
| <b>PCV</b>                                    | <b>Intermediate</b> |
| Overall                                       | 77                  |
| Gender                                        |                     |
| Male                                          | 78                  |
| Female                                        | 76                  |
| Income quintile                               |                     |
| Q1 (lowest)                                   | 70                  |
| Q2                                            | 77                  |
| Q3                                            | 80                  |
| Q4                                            | 81                  |
| Q5 (highest)                                  | 81                  |
| Unknown                                       | 76                  |
| Residence                                     |                     |
| Rural                                         | 69                  |
| Urban                                         | 83                  |
| Unknown                                       | 82                  |
| Winnipeg region of residence                  |                     |
| Northern suburbs                              | 85                  |
| Inner city                                    | 77                  |
| Southern suburbs                              | 85                  |
| Regional health authority of residence        |                     |
| Winnipeg                                      | 84                  |

|                              |    |
|------------------------------|----|
| Interlake-Eastern            | 77 |
| Northern                     | 65 |
| Southern                     | 63 |
| Prairie Mountain             | 80 |
| Public Trustee / In CFS care | 82 |

| <b>MenC-C</b>                          | <b>Dose 1 uptake at 24 months<sup>d</sup></b> |
|----------------------------------------|-----------------------------------------------|
|                                        | <b>Intermediate</b>                           |
| Overall                                | 85                                            |
| Gender                                 |                                               |
| Male                                   | 85                                            |
| Female                                 | 84                                            |
| Income quintile                        |                                               |
| Q1 (lowest)                            | 80                                            |
| Q2                                     | 85                                            |
| Q3                                     | 87                                            |
| Q4                                     | 85                                            |
| Q5 (highest)                           | 88                                            |
| Unknown                                | 84                                            |
| Residence                              |                                               |
| Rural                                  | 77                                            |
| Urban                                  | 91                                            |
| Unknown                                | 87                                            |
| Winnipeg region of residence           |                                               |
| Northern suburbs                       | 92                                            |
| Inner city                             | 86                                            |
| Southern suburbs                       | 92                                            |
| Regional health authority of residence |                                               |
| Winnipeg                               | 91                                            |
| Interlake-Eastern                      | 82                                            |
| Northern                               | 80                                            |
| Southern                               | 68                                            |
| Prairie Mountain                       | 87                                            |
| Public Trustee / In CFS care           | 87                                            |

| <b>MMR</b> | <b>Dose 1 uptake at 24 months<sup>d</sup></b> |
|------------|-----------------------------------------------|
|            | <b>Intermediate</b>                           |
| Overall    | 85                                            |
| Gender     |                                               |

|                                        |    |
|----------------------------------------|----|
| Male                                   | 85 |
| Female                                 | 85 |
| Income quintile                        |    |
| Q1 (lowest)                            | 80 |
| Q2                                     | 85 |
| Q3                                     | 87 |
| Q4                                     | 85 |
| Q5 (highest)                           | 89 |
| Unknown                                | 85 |
| Residence                              |    |
| Rural                                  | 77 |
| Urban                                  | 91 |
| Unknown                                | 87 |
| Winnipeg region of residence           |    |
| Northern suburbs                       | 92 |
| Inner city                             | 86 |
| Southern suburbs                       | 92 |
| Regional health authority of residence |    |
| Winnipeg                               | 91 |
| Interlake-Eastern                      | 83 |
| Northern                               | 80 |
| Southern                               | 69 |
| Prairie Mountain                       | 88 |
| Public Trustee / In CFS care           | 87 |

**Dose 1 uptake at 24 months<sup>d</sup>**

|                  |                     |
|------------------|---------------------|
| <b>Varicella</b> |                     |
|                  | <b>Intermediate</b> |
| Overall          | 84                  |
| Gender           |                     |
| Male             | 84                  |
| Female           | 84                  |
| Income quintile  |                     |
| Q1 (lowest)      | 80                  |
| Q2               | 85                  |
| Q3               | 86                  |
| Q4               | 84                  |
| Q5 (highest)     | 88                  |
| Unknown          | 85                  |

|                                        |    |
|----------------------------------------|----|
| Residence                              |    |
| Rural                                  | 77 |
| Urban                                  | 90 |
| Unknown                                | 87 |
| Winnipeg region of residence           |    |
| Northern suburbs                       | 92 |
| Inner city                             | 86 |
| Southern suburbs                       | 91 |
| Regional health authority of residence |    |
| Winnipeg                               | 90 |
| Interlake-Eastern                      | 82 |
| Northern                               | 80 |
| Southern                               | 68 |
| Prairie Mountain                       | 87 |
| Public Trustee / In CFS care           | 87 |

**Dose 3 uptake at 24 months<sup>e</sup>**

|                                        |                     |
|----------------------------------------|---------------------|
| <b>Polio</b>                           | <b>Intermediate</b> |
| Overall                                | 86                  |
| Gender                                 |                     |
| Male                                   | 87                  |
| Female                                 | 86                  |
| Income quintile                        |                     |
| Q1 (lowest)                            | 82                  |
| Q2                                     | 87                  |
| Q3                                     | 88                  |
| Q4                                     | 86                  |
| Q5 (highest)                           | 91                  |
| Unknown                                | 90                  |
| Residence                              |                     |
| Rural                                  | 78                  |
| Urban                                  | 93                  |
| Unknown                                | 83                  |
| Winnipeg region of residence           |                     |
| Northern suburbs                       | 94                  |
| Inner city                             | 89                  |
| Southern suburbs                       | 94                  |
| Regional health authority of residence |                     |

|                              |    |
|------------------------------|----|
| Winnipeg                     | 93 |
| Interlake-Eastern            | 84 |
| Northern                     | 81 |
| Southern                     | 70 |
| Prairie Mountain             | 88 |
| Public Trustee / In CFS care | 83 |

| <b>DTaP</b>                            | <b>Dose 4 uptake at 24 months<sup>e</sup></b> |
|----------------------------------------|-----------------------------------------------|
|                                        | <b>Intermediate</b>                           |
| Overall                                | 69                                            |
| Gender                                 |                                               |
| Male                                   | 70                                            |
| Female                                 | 68                                            |
| Income quintile                        |                                               |
| Q1 (lowest)                            | 56                                            |
| Q2                                     | 70                                            |
| Q3                                     | 74                                            |
| Q4                                     | 74                                            |
| Q5 (highest)                           | 78                                            |
| Unknown                                | 72                                            |
| Residence                              |                                               |
| Rural                                  | 59                                            |
| Urban                                  | 77                                            |
| Unknown                                | 50                                            |
| Winnipeg region of residence           |                                               |
| Northern suburbs                       | 79                                            |
| Inner city                             | 68                                            |
| Southern suburbs                       | 80                                            |
| Regional health authority of residence |                                               |
| Winnipeg                               | 77                                            |
| Interlake-Eastern                      | 64                                            |
| Northern                               | 51                                            |
| Southern                               | 55                                            |
| Prairie Mountain                       | 75                                            |
| Public Trustee / In CFS care           | 50                                            |

| <b>HiB</b> | <b>Dose 4 uptake at 24 months<sup>e</sup></b> |
|------------|-----------------------------------------------|
|            | <b>Intermediate</b>                           |
| Overall    | 69                                            |

|                                        |    |
|----------------------------------------|----|
| Gender                                 |    |
| Male                                   | 69 |
| Female                                 | 68 |
| Income quintile                        |    |
| Q1 (lowest)                            | 56 |
| Q2                                     | 69 |
| Q3                                     | 74 |
| Q4                                     | 73 |
| Q5 (highest)                           | 77 |
| Unknown                                | 71 |
| Residence                              |    |
| Rural                                  | 59 |
| Urban                                  | 77 |
| Unknown                                | 50 |
| Winnipeg region of residence           |    |
| Northern suburbs                       | 79 |
| Inner city                             | 68 |
| Southern suburbs                       | 79 |
| Regional health authority of residence |    |
| Winnipeg                               | 77 |
| Interlake-Eastern                      | 63 |
| Northern                               | 51 |
| Southern                               | 54 |
| Prairie Mountain                       | 74 |
| Public Trustee / In CFS care           | 50 |

DTaP = Diphtheria, tetanus, and acellular pertussis vaccine

MMR = Measles, mumps, and rubella vaccine

PCV = 13-valent pneumococcal conjugate vaccine

MenC-C = Meningococcal conjugate serogroup C vaccine

HiB = Haemophilus influenzae type b vaccine

<sup>a</sup> Recommended age is 4 months; Intermediate cohort, born March 15, 2019 - November 15, 2019

<sup>b</sup> Recommended age is 6 months; Intermediate cohort, born March 15, 2019 - September 15, 2019

<sup>c</sup> Recommended age is 12 months; Intermediate cohort, born September 15, 2018 - March 15, 2019

<sup>d</sup> Recommended age is 12 months; Intermediate cohort, born March 15, 2018 - March 15, 2019

<sup>e</sup> Recommended age is 18 months; Intermediate cohort, born March 15, 2018 - September 15, 2018

Table S4 **Changes in vaccine uptake (%) of routine childhood vaccines during the pandemic according to region of residence and income quintile (data ending November 30, 2021).**

| DTaP              | Dose 3 uptake at 12 months <sup>a</sup> |          |                 |             | Dose 4 uptake at 24 months <sup>b</sup> |          |                 |             |
|-------------------|-----------------------------------------|----------|-----------------|-------------|-----------------------------------------|----------|-----------------|-------------|
|                   | Pre-pandemic                            | Pandemic | Relative change | Fold change | Pre-pandemic                            | Pandemic | Relative change | Fold change |
| Overall           | 80                                      | 74       | -7%             |             | 71                                      | 64       | -10%            |             |
| Winnipeg          |                                         |          |                 |             |                                         |          |                 |             |
| Q1 (lowest)       | 81                                      | 77       | -5%             | -47.6       | 70                                      | 62       | -12%            | 4.7         |
| Q2                | 87                                      | 85       | -3%             | -25.2       | 79                                      | 72       | -9%             | 3.5         |
| Q3                | 89                                      | 87       | -3%             | -25.4       | 81                                      | 79       | -4%             | 1.4         |
| Q4                | 91                                      | 88       | -3%             | -33.7       | 84                                      | 80       | -4%             | 1.8         |
| Q5 (highest)      | 91                                      | 91       | 0%              | ref.        | 85                                      | 83       | -2%             | ref.        |
| Interlake-Eastern |                                         |          |                 |             |                                         |          |                 |             |
| Q1 (lowest)       | 70                                      | 45       | -36%            | 3.6         | 63                                      | 40       | -36%            | 37.8        |
| Q2                | 84                                      | 77       | -8%             | 0.8         | 71                                      | 68       | -4%             | 4.1         |
| Q3                | 78                                      | 68       | -13%            | 1.3         | 61                                      | 58       | -5%             | 5.7         |
| Q4                | 81                                      | 77       | -4%             | 0.4         | 70                                      | 70       | 0%              | -0.1        |
| Q5 (highest)      | 84                                      | 75       | -10%            | ref.        | 77                                      | 77       | -1%             | ref.        |
| Northern          |                                         |          |                 |             |                                         |          |                 |             |
| Q1 (lowest)       | 51                                      | 40       | -21%            | 4.1         | 39                                      | 30       | -23%            | 13.6        |
| Q2                | 63                                      | 41       | -34%            | 6.7         | 51                                      | 30       | -41%            | 23.9        |
| Q3                | 68                                      | 56       | -18%            | 3.5         | 58                                      | 40       | -31%            | 18.1        |
| Q4                | 80                                      | 71       | -12%            | 2.3         | 67                                      | 54       | -20%            | 11.9        |
| Q5 (highest)      | 88                                      | 84       | -5%             | ref.        | 75                                      | 73       | -2%             | ref.        |
| Southern          |                                         |          |                 |             |                                         |          |                 |             |
| Q1 (lowest)       | 55                                      | 43       | -23%            | 5.7         | 44                                      | 33       | -25%            | 2.2         |
| Q2                | 66                                      | 55       | -17%            | 4.3         | 61                                      | 49       | -20%            | 1.8         |
| Q3                | 67                                      | 62       | -8%             | 1.9         | 61                                      | 54       | -12%            | 1.0         |
| Q4                | 66                                      | 56       | -15%            | 3.6         | 61                                      | 51       | -17%            | 1.6         |
| Q5 (highest)      | 73                                      | 70       | -4%             | ref.        | 68                                      | 61       | -11%            | ref.        |

|                                               |                     |                 |                        |                                               |                     |                 |                        |                    |
|-----------------------------------------------|---------------------|-----------------|------------------------|-----------------------------------------------|---------------------|-----------------|------------------------|--------------------|
| Prairie Mountain                              |                     |                 |                        |                                               |                     |                 |                        |                    |
| Q1 (lowest)                                   | 73                  | 65              | -11%                   | 3.5                                           | 64                  | 53              | -17%                   | 1.1                |
| Q2                                            | 83                  | 77              | -8%                    | 2.4                                           | 74                  | 67              | -9%                    | 0.6                |
| Q3                                            | 88                  | 84              | -5%                    | 1.5                                           | 80                  | 76              | -5%                    | 0.3                |
| Q4                                            | 88                  | 84              | -5%                    | 1.4                                           | 80                  | 76              | -5%                    | 0.3                |
| Q5 (highest)                                  | 85                  | 82              | -3%                    | ref.                                          | 84                  | 71              | -16%                   | ref.               |
| <b>Dose 1 uptake at 18 months<sup>c</sup></b> |                     |                 |                        | <b>Dose 1 uptake at 24 months<sup>d</sup></b> |                     |                 |                        |                    |
| <b>MMR</b>                                    | <b>Pre-pandemic</b> | <b>Pandemic</b> | <b>Relative change</b> | <b>Fold change</b>                            | <b>Pre-pandemic</b> | <b>Pandemic</b> | <b>Relative change</b> | <b>Fold change</b> |
| Overall                                       | 82                  | 75              | -9%                    |                                               | 86                  | 80              | -7%                    |                    |
| Winnipeg                                      |                     |                 |                        |                                               |                     |                 |                        |                    |
| Q1 (lowest)                                   | 83                  | 77              | -7%                    | 2.2                                           | 88                  | 83              | -6%                    | 4.8                |
| Q2                                            | 89                  | 85              | -5%                    | 1.5                                           | 92                  | 89              | -4%                    | 3.5                |
| Q3                                            | 90                  | 88              | -2%                    | 0.6                                           | 92                  | 92              | -1%                    | 0.6                |
| Q4                                            | 92                  | 89              | -3%                    | 0.9                                           | 93                  | 91              | -2%                    | 1.8                |
| Q5 (highest)                                  | 93                  | 90              | -3%                    | ref.                                          | 94                  | 93              | -1%                    | ref.               |
| Interlake-Eastern                             |                     |                 |                        |                                               |                     |                 |                        |                    |
| Q1 (lowest)                                   | 76                  | 57              | -25%                   | 7.7                                           | 82                  | 67              | -19%                   | -13.4              |
| Q2                                            | 81                  | 74              | -9%                    | 2.6                                           | 82                  | 77              | -6%                    | -4.4               |
| Q3                                            | 77                  | 70              | -8%                    | 2.5                                           | 81                  | 80              | -1%                    | -0.9               |
| Q4                                            | 81                  | 77              | -5%                    | 1.5                                           | 84                  | 84              | 0%                     | 0.3                |
| Q5 (highest)                                  | 85                  | 82              | -3%                    | ref.                                          | 86                  | 87              | 1%                     | ref.               |
| Northern                                      |                     |                 |                        |                                               |                     |                 |                        |                    |
| Q1 (lowest)                                   | 68                  | 53              | -22%                   | 3.9                                           | 79                  | 65              | -18%                   | 16.0               |
| Q2                                            | 77                  | 52              | -33%                   | 5.8                                           | 89                  | 71              | -19%                   | 17.3               |
| Q3                                            | 78                  | 55              | -30%                   | 5.3                                           | 86                  | 74              | -13%                   | 11.9               |
| Q4                                            | 82                  | 61              | -26%                   | 4.5                                           | 92                  | 70              | -24%                   | 21.4               |
| Q5 (highest)                                  | 88                  | 83              | -6%                    | ref.                                          | 88                  | 87              | -1%                    | ref.               |
| Southern                                      |                     |                 |                        |                                               |                     |                 |                        |                    |
| Q1 (lowest)                                   | 59                  | 45              | -23%                   | 3.8                                           | 66                  | 51              | -22%                   | 3.0                |
| Q2                                            | 69                  | 58              | -16%                   | 2.5                                           | 74                  | 61              | -17%                   | 2.2                |
| Q3                                            | 68                  | 62              | -9%                    | 1.4                                           | 73                  | 68              | -7%                    | 0.9                |

|                     |    |    |      |      |    |    |      |      |
|---------------------|----|----|------|------|----|----|------|------|
| Q4                  | 67 | 57 | -15% | 2.4  | 72 | 60 | -16% | 2.2  |
| Q5<br>(highest)     | 76 | 71 | -6%  | ref. | 78 | 72 | -8%  | ref. |
| Prairie<br>Mountain |    |    |      |      |    |    |      |      |
| Q1 (lowest)         | 78 | 67 | -15% | 1.7  | 85 | 72 | -15% | 2.5  |
| Q2                  | 84 | 73 | -12% | 1.4  | 86 | 76 | -12% | 2.0  |
| Q3                  | 87 | 81 | -7%  | 0.7  | 90 | 85 | -5%  | 0.8  |
| Q4                  | 88 | 83 | -6%  | 0.6  | 92 | 87 | -5%  | 0.9  |
| Q5<br>(highest)     | 90 | 82 | -9%  | ref. | 93 | 88 | -6%  | ref. |

DTaP = Diphtheria, tetanus, and acellular pertussis vaccine

MMR = Measles, mumps, and rubella vaccine

<sup>a</sup> Recommended age is 6 months; Pre-pandemic cohort, born January 1, 2017 - March 15, 2019; Pandemic cohort, born September 15, 2019 and later

<sup>b</sup> Recommended age is 18 months; Pre-pandemic cohort, born January 1, 2017 - March 15, 2018; Pandemic cohort, born September 15, 2018 and later

<sup>c</sup> Recommended age is 12 months; Pre-pandemic cohort, born January 1, 2017 - September 15, 2018; Pandemic cohort, born March 15, 2019 and later

<sup>d</sup> Recommended age is 12 months; Pre-pandemic cohort, born January 1, 2017 - March 15, 2018; Pandemic cohort, born March 15, 2019 and later
